# Supplementary material
Source: PubMed Central journal article supplement (PMC4655981)

## **Supplementary methods**

### **Caveolin-1 K/O mice**

Male congenic caveolin-1 deficient mice (KO), originally obtained from Jackson Laboratory, were bred at the local animal facility BMC (Lund, Sweden) and maintained by homozygous breeding. Male wild type (WT) C57BL6/J mice, matched for age, were obtained from Taconic (Denmark). The local animal ethics committee in Lund/Malmö approved all experiments.

### **Supplementary Figure legends**

**S1.** Primary adipose cells were pre-incubated with propranolol (10  $\mu$ M, 30 min), followed by 30 min incubation with either Milano (150  $\mu$ g/ml) or Iso (10 nM). Glycerol release was measured in medium, data presented as  $\mu$ mol/30min/ml, n=3 independent experiments, samples run in duplicate. All data shown as means  $\pm$  SEM. \*\* $p \leq 0.01$ , \*\*\*\* $p \leq 0.0001$ .

**S2.** Primary adipose cells were pre-incubated with propranolol (10  $\mu$ M, 30 min), followed by 30 min incubation with either Milano (150  $\mu$ g/ml) or Iso (10 nM). Cells lysates were subjected to western blot and analyzed to determine total protein expression levels of ATGL, phosphorylation of pPKA substrate, and SIK pSer538. The figure shows representative western blots, n=3 independent experiments, samples run in duplicate.

**S3.** Adipose cells isolated from caveolin-1 deficient and control mice were incubated with either ApoA-I Milano (150  $\mu$ g/ml), Iso (10 nM) or left untreated for 30 min. Glycerol release was measured in medium, data presented as  $\mu$ mol/30min/ml. Due to variation comparing effects of Iso and Milano-stimulated

lipolysis (0.5 to 5.8 fold) data is presented as fold response for each stimuli, respectively, n=3 independent experiments, samples run in duplicate. All data shown as means  $\pm$  SEM. \* $p \leq 0.05$ .

# S1

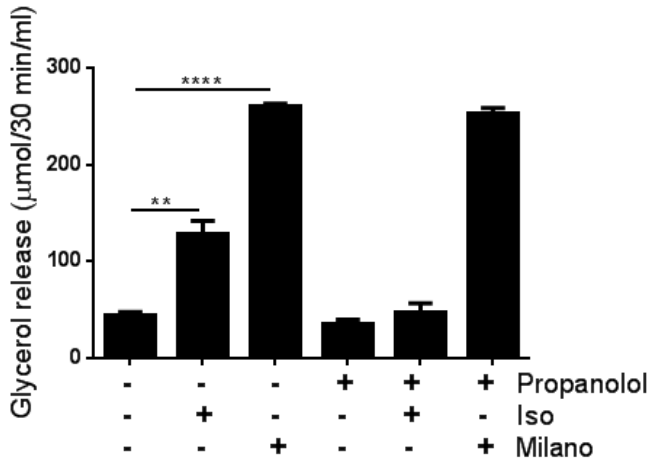

# S2

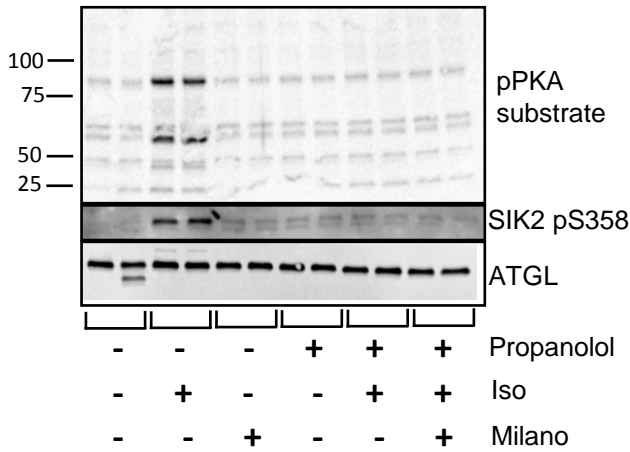

# S3

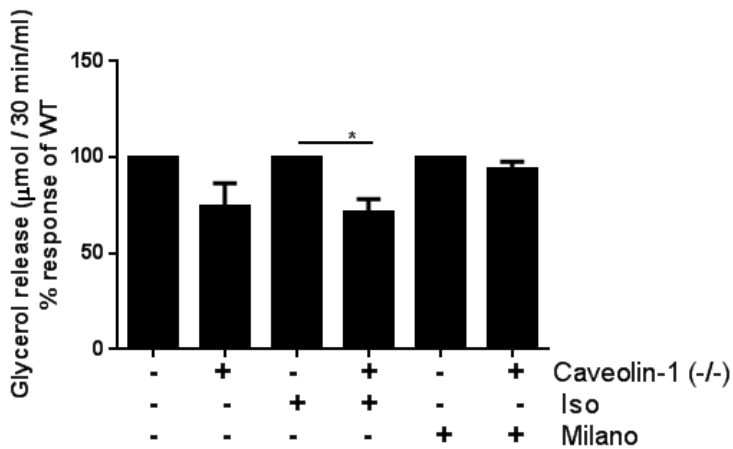

Supplement: 10.1194_M054767_jlr.M054767-1.pdf [file 10.1194_M054767_jlr.M054767-1.pdf]
